# Supplementary material for: Transformation of carbon dots by ultraviolet irradiation, ozonation, and chlorination processes: kinetics and mechanisms
Source: Royal Society of Chemistry journal article supplement (doi:10.1039/d1en00698c), 2021-12-01
Supplement: d1en00698c1.pdf [file d1en00698c1.pdf]

## Supporting Information

**Transformation of carbon dots by ultraviolet irradiation, ozonation, and chlorination**

**processes: Kinetics and mechanisms**

Mengyao Shen, Jingyi Wu, Yuzheng He, Guoguang Liu, and Yiping Feng\*

*Guangzhou Key Laboratory Environmental Catalysis and Pollution Control,  
Guangdong Key Laboratory of Environmental Catalysis and Health Risk Control,  
School of Environmental Science and Engineering, Institute of Environmental Health  
and Pollution Control, Guangdong University of Technology, Guangzhou 510006,  
China*

**\*Corresponding author:**

Yiping Feng, E-mail: ypfeng@gdut.edu.cn, Phone: 86-15989197900

**Scheme S1:** Radicals' generation in ultraviolet irradiation, ozonation, and chlorination processes.

Ultraviolet irradiation:<sup>1, 2</sup>

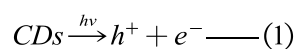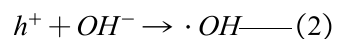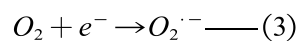

Ozonation:<sup>3</sup>

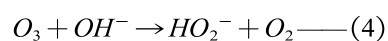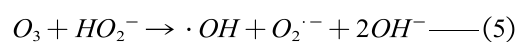

Chlorination:<sup>4</sup>

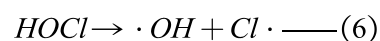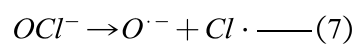

**Scheme S2:** Radical interconversion reactions <sup>5-8</sup>

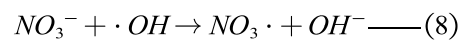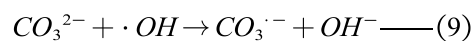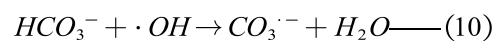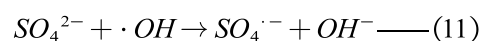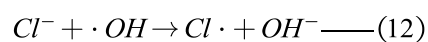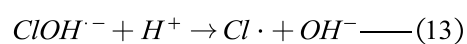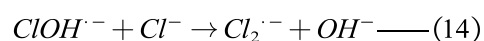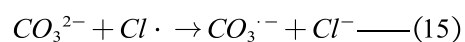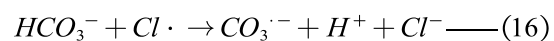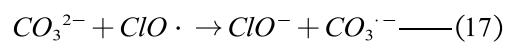

**Table S1.** Primary properties of various water samples.

| Parameter                                  | Unit               | Zhujiang    | Tap water | WWTP effluent | South China |
|--------------------------------------------|--------------------|-------------|-----------|---------------|-------------|
|                                            |                    | River water |           | water         | Sea water   |
| pH                                         | -                  | 7.12        | 7.48      | 6.89          | 8.23        |
| TOC                                        | mg L <sup>-1</sup> | 3.025       | 1.217     | 4.165         | 0.3597      |
| Na <sup>+</sup> <sup>a</sup>               | mg L <sup>-1</sup> | 16.83       | 11.35     | 37.20         | 10241       |
| K <sup>+</sup> <sup>a</sup>                | mg L <sup>-1</sup> | 4.62        | 3.68      | 10.87         | 396         |
| Cu <sup>2+</sup> <sup>a</sup>              | μg L <sup>-1</sup> | 0.98        | /         | /             | 50.18       |
| Mg <sup>2+</sup> <sup>a</sup>              | mg L <sup>-1</sup> | 3.97        | 3.21      | 7.01          | 1459        |
| Al <sup>3+</sup> <sup>a</sup>              | μg L <sup>-1</sup> | 6.51        | 22.7      | 9.27          | 3.36        |
| Cl <sup>-</sup> <sup>b</sup>               | mg L <sup>-1</sup> | 14.58       | 11.20     | 49.86         | 18984.02    |
| HCO <sub>3</sub> <sup>-</sup>              | mg L <sup>-1</sup> | 4.98        | 3.62      | 3.03          | 6.01        |
| SO <sub>4</sub> <sup>2-</sup> <sup>b</sup> | mg L <sup>-1</sup> | 28.23       | 16.89     | 39.68         | 2706.02     |

<sup>a</sup> Detected by ICP-MS.

<sup>b</sup> Detected by anions-ion chromatography.

**Table S2.** Scavengers used, RSs quenched and rate constants with quenched reactive species.

|                  | Quencher                                             | RSs Quenched                 | Removal Rate (%) | Inhibition (%) |
|------------------|------------------------------------------------------|------------------------------|------------------|----------------|
| UV               | Blank                                                | \                            | 66.5             | 0              |
|                  | Na <sub>2</sub> C <sub>2</sub> O <sub>4</sub>        | h <sup>+</sup>               | 39.1             | 41.2           |
|                  | K <sub>2</sub> Cr <sub>2</sub> O <sub>7</sub>        | e <sup>-</sup>               | 63.8             | 4.1            |
|                  | IPA                                                  | •OH                          | 56.0             | 15.8           |
|                  | TEMPO                                                | O <sub>2</sub> <sup>•-</sup> | 27.4             | 58.8           |
|                  | NaN <sub>3</sub>                                     | <sup>1</sup> O <sub>2</sub>  | 43.7             | 34.3           |
|                  | O <sub>3</sub>                                       | Blank                        | \                | 81.7           |
| IPA              |                                                      | •OH                          | 77.7             | 4.9            |
| TEMPO            |                                                      | O <sub>2</sub> <sup>•-</sup> | 33.0             | 59.6           |
| NaN <sub>3</sub> |                                                      | <sup>1</sup> O <sub>2</sub>  | 54.2             | 33.7           |
| NaClO            | Blank                                                | \                            | 30.3             | 0              |
|                  | 0.1 μM Na <sub>2</sub> S <sub>2</sub> O <sub>3</sub> | Cl• /ClO•                    | 14.5             | 52.1           |
|                  | 0.1 μM Na <sub>2</sub> S <sub>2</sub> O <sub>3</sub> | Cl• /ClO•                    | 0                | 100            |

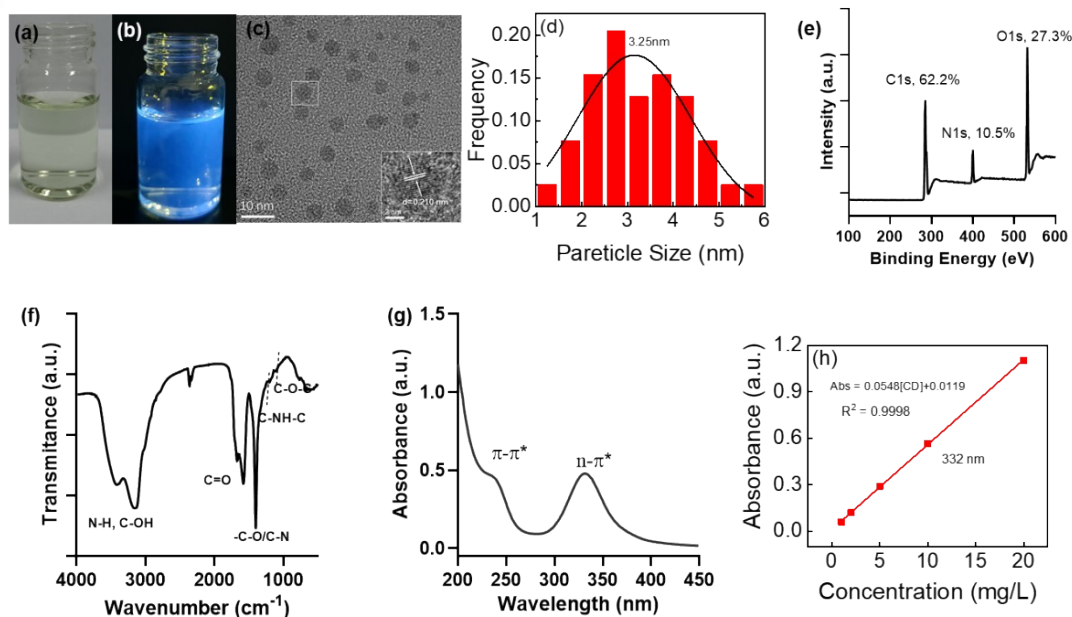

**Fig. S1.** Characterizations of the prepared CDs, the photographs of the (a) visible color of CDs and (b) fluorescence color under UV lamp irradiation; (c) TEM images and (d) diameter distribution of CDs, (e) XPS, (f) FT-IR spectra of CDs, (g) UV-vis absorption spectra of CDs and (h) liner correlation between CD concentration and its UV-vis absorbance with wavelength of 332 nm.

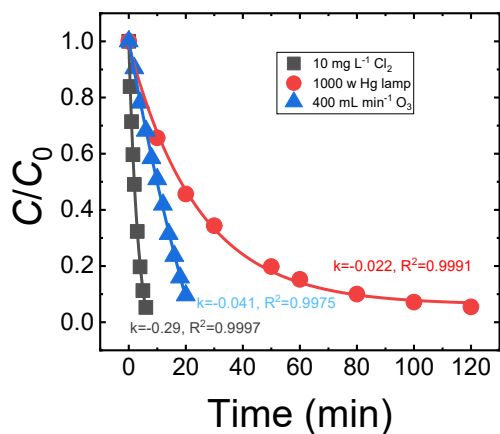

**Fig. S2.** Reaction kinetics of sodium indigo disulfonate treated by 1000W mercury lamp irradiation, 400 mL /min ozone oxidation, and chlorination with 10 mg/L  $\text{Cl}_2$ , respectively.

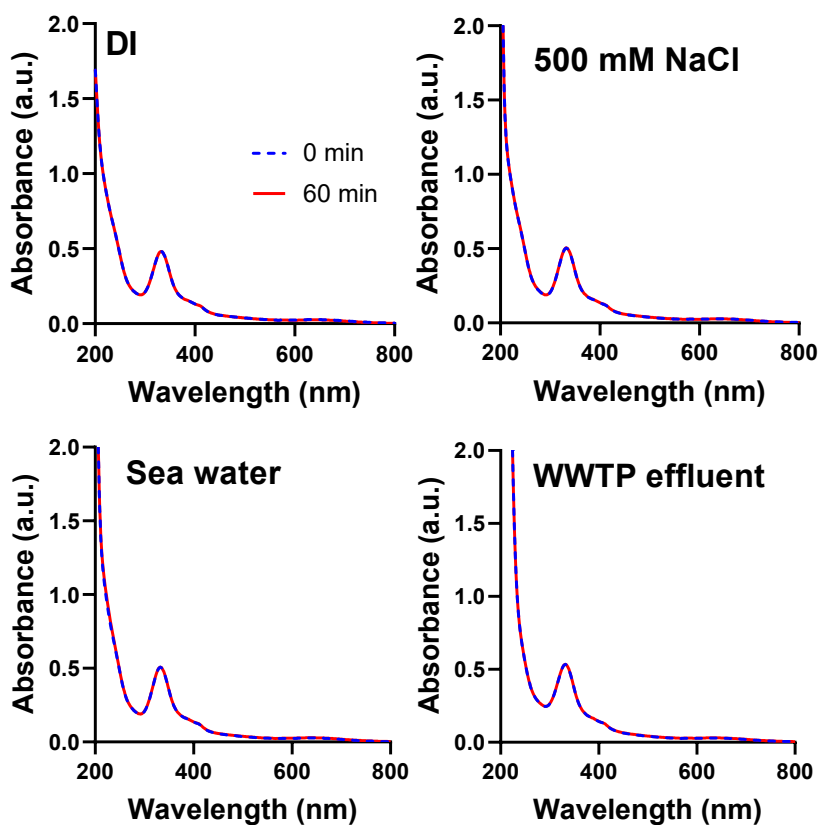

**Fig. S3.** UV–vis absorption spectra of CDs in various solutions including DI water, DI water with 500 mM NaCl, sea water, and WWTP effluent at pH=7.0.

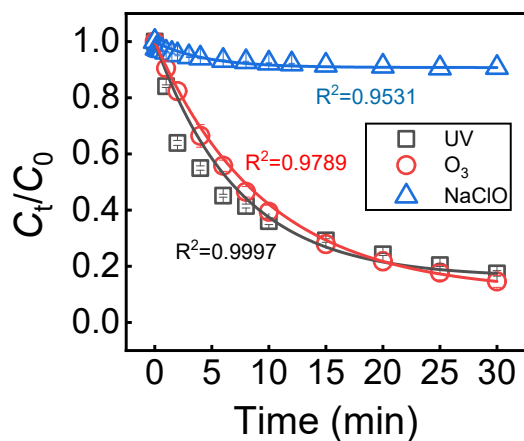

**Fig. S4.** Degradation kinetics of CDs in three typical disinfection processes including UV irradiation, ozonation, and chlorination.

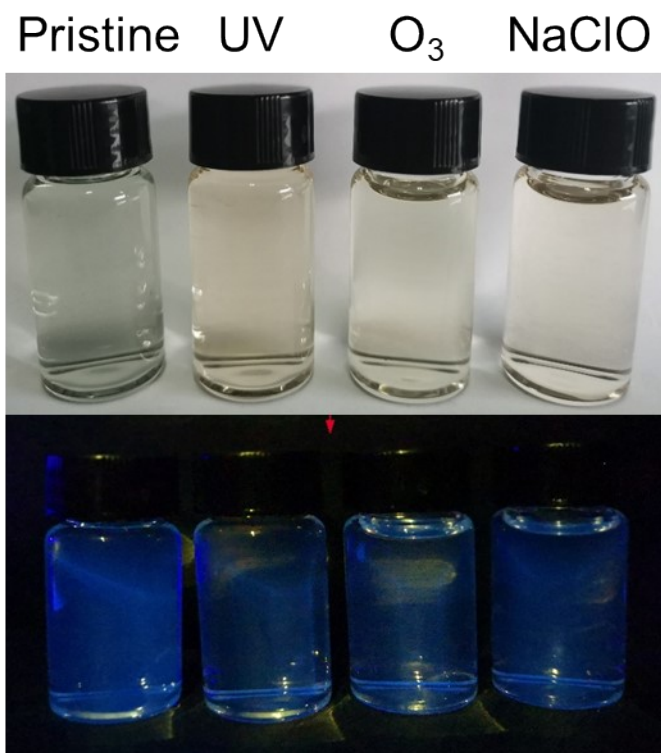

**Fig. S5.** Visual change of color and fluorescence intensity of pristine CDs and after treated by three disinfection processes.

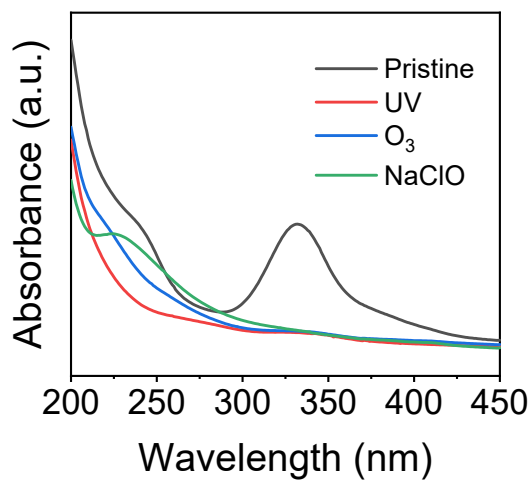

**Fig. S6.** UV-vis spectra change of pristine CDs and after treated by three disinfection processes.

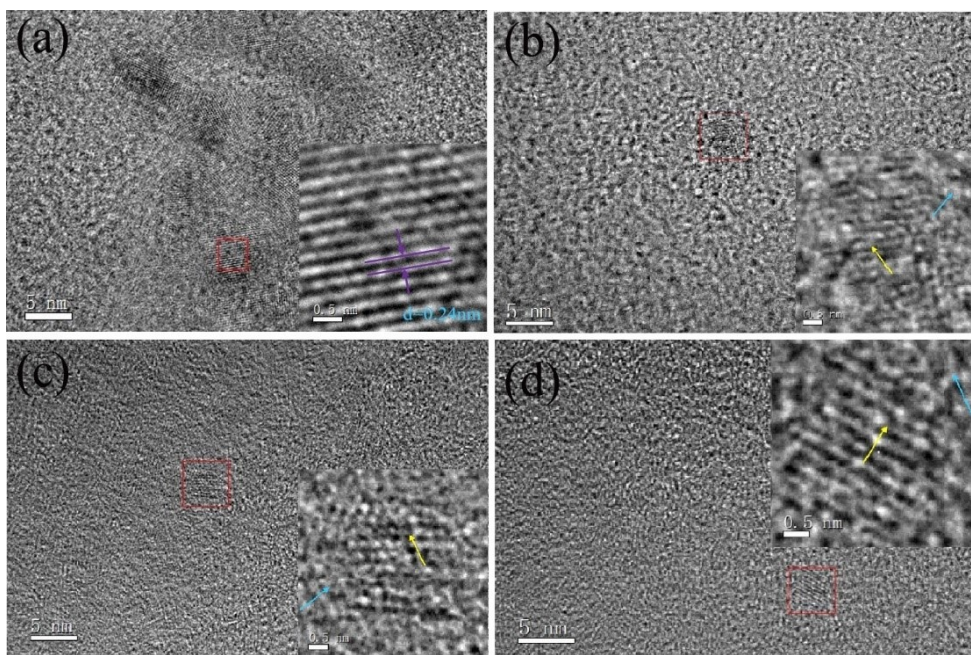

**Fig. S7.** HR-TEM images of the pristine and three different disinfectants-treated CDs. (a) Pristine CDs, (b) UV irradiated-CDs, (c) O<sub>3</sub> treated CDs, (d) chlorinated-CDs. yellow arrows indicate intact region, blue arrows show damaged regions of CDs.

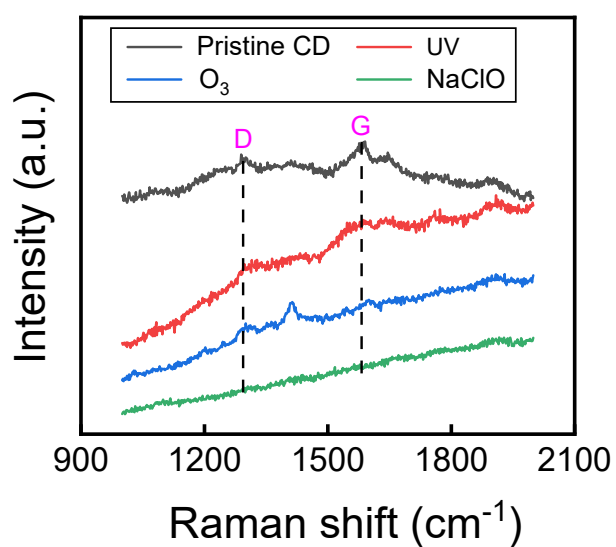

**Fig. S8.** Raman spectra of CDs before and after treatment by different disinfection processes.

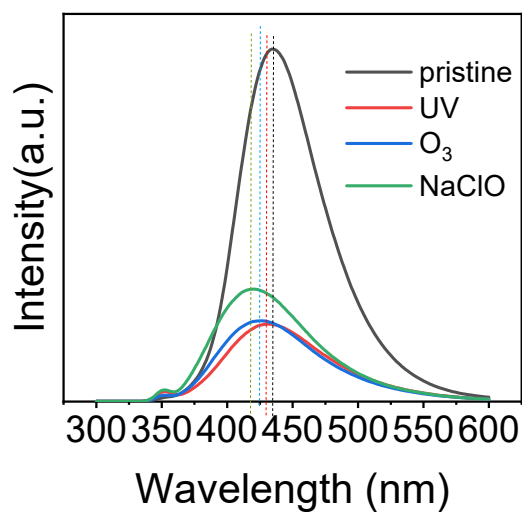

**Fig. S9.** The emission spectra of pristine and treated CDs excited at wavelength of 350 nm.

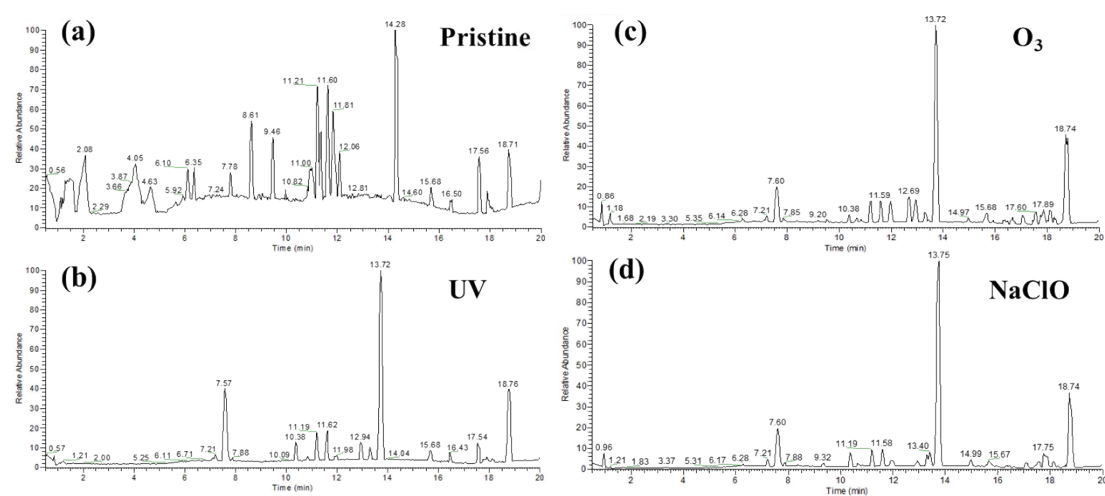

**Fig. S10.** HPLC chromatograms of CDs before and after transformation, (a) the pristine CDs, (b-d) CDs treated with UV, ozone and chlorine, respectively



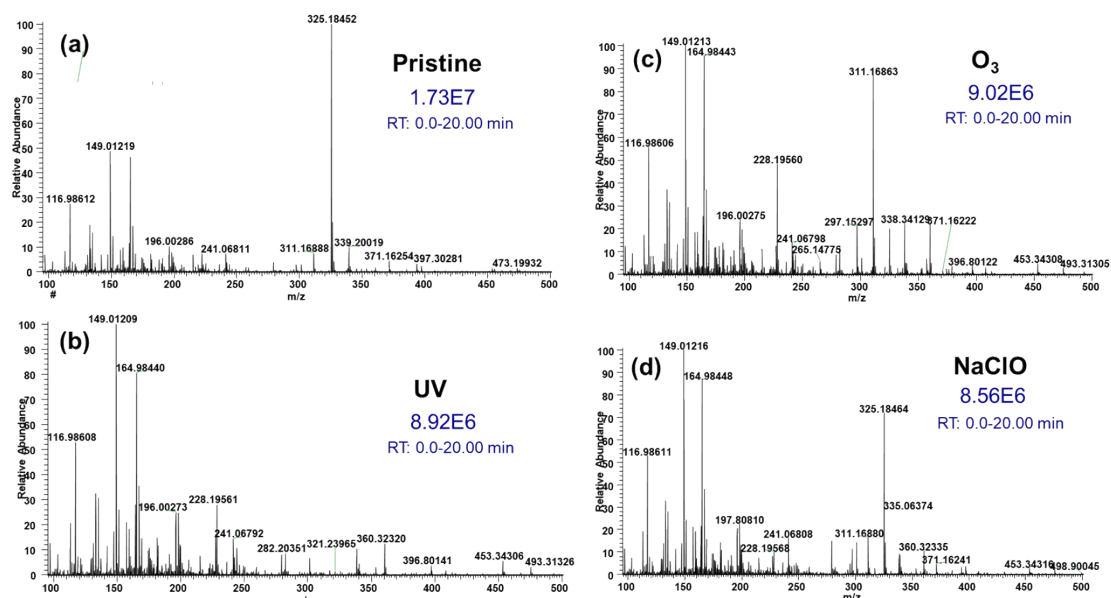

**Fig. S11.** Positive ion mode mass spectrometry of CDs before and after transformation, (a) the pristine CDs, (b-d) CDs treated with UV, ozone and chlorine, respectively.

### Possible intermediates in UV and O<sub>3</sub> treatments:

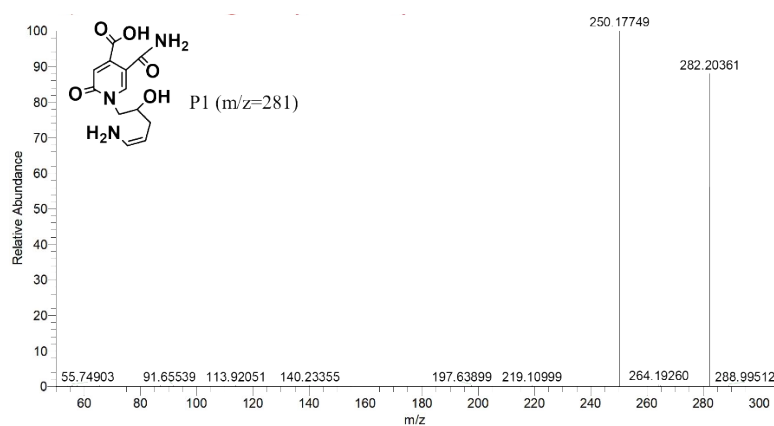

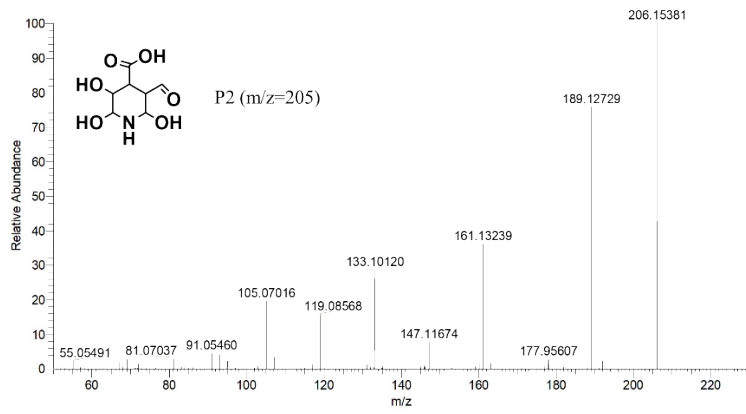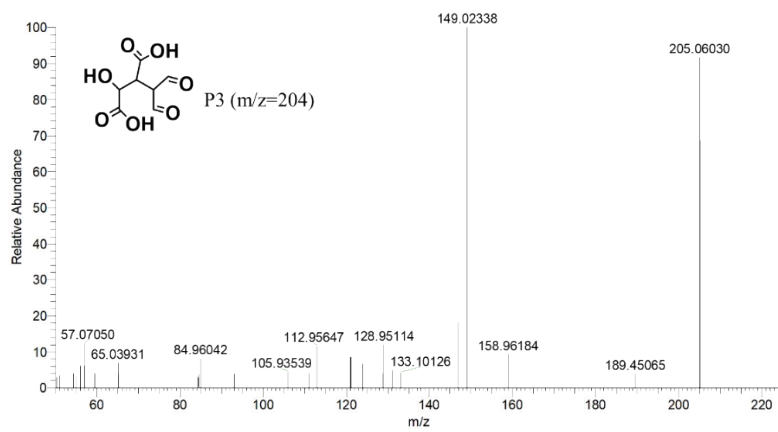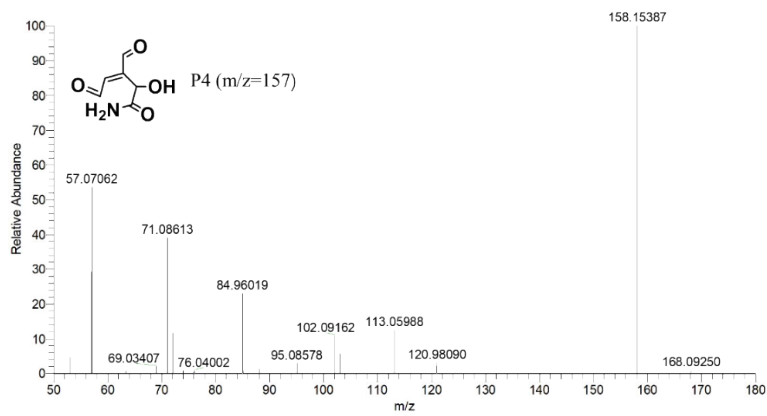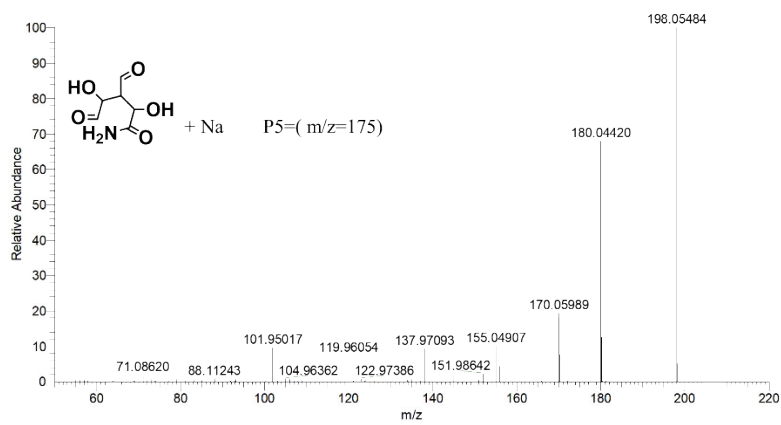

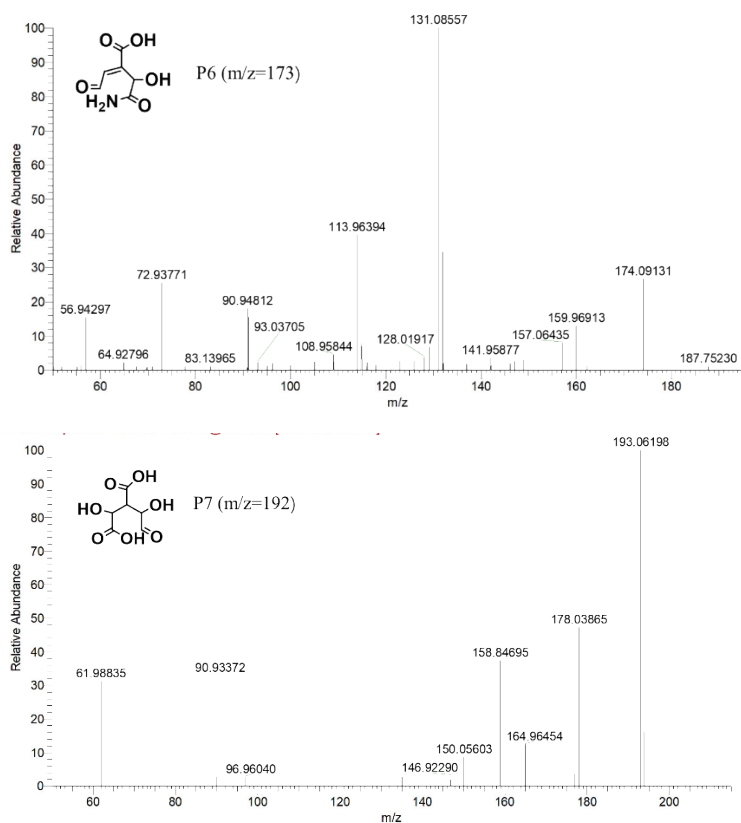

**Fig. S12.** Proposed structures of some possible products in UV and ozone treatment.

### Possible intermediates in NaClO treatment:

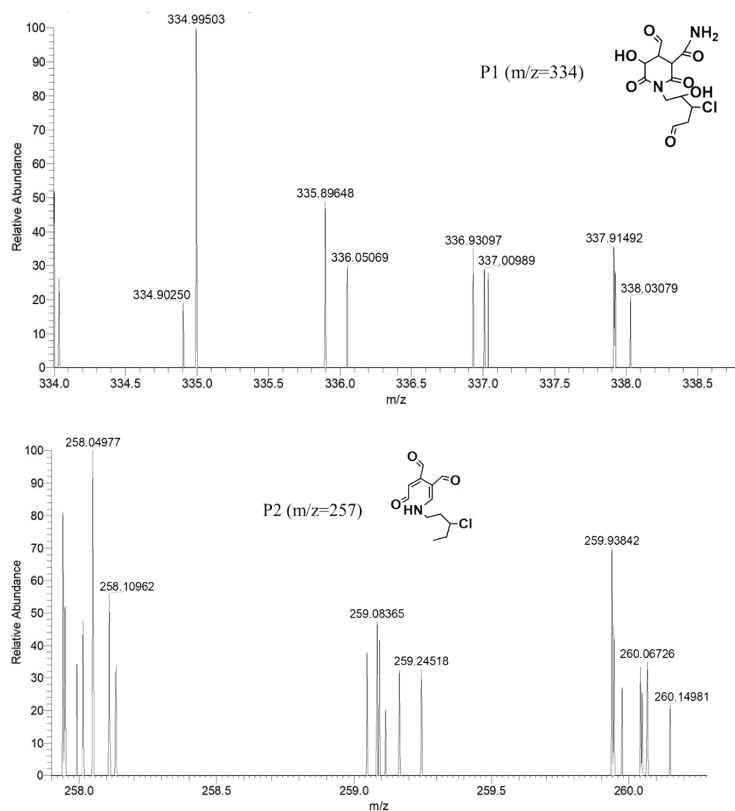

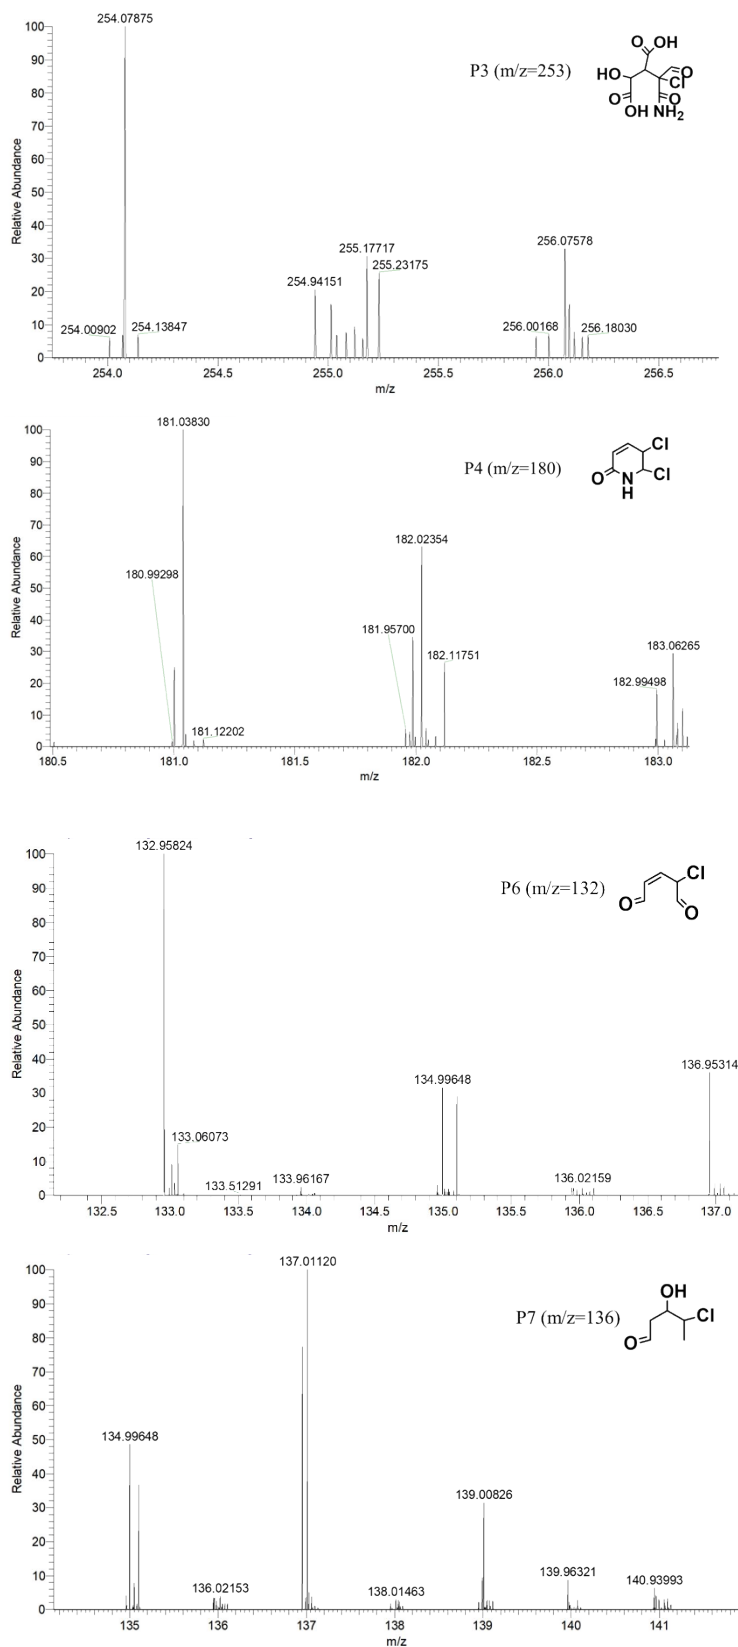

**Fig. S13.** Proposed structures of some possible products in chlorination treatment.

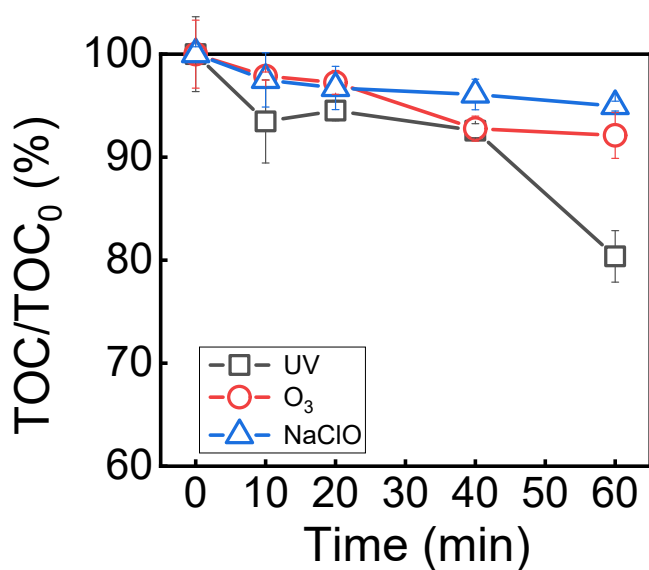

**Fig. S14.** Changes of total organic carbon (TOC) content before and after CDs transformation.

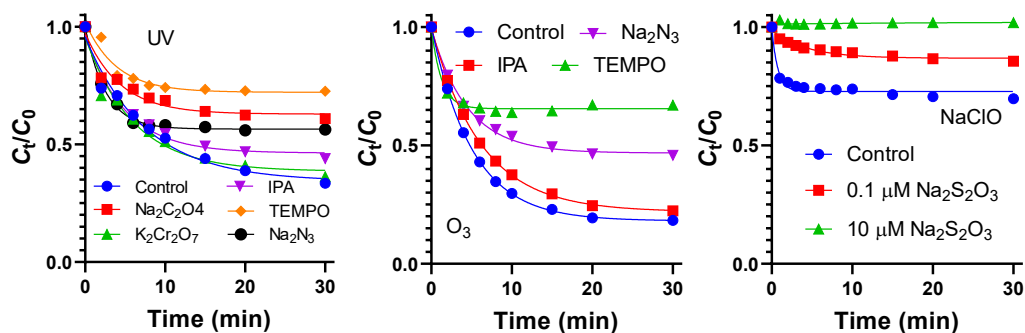

**Fig. S15.** Isopropanol (IPA, 10 mM), 2, 2 , 6, 6-tetramethylpiperidine-1-oxyl (TEMPO, 10 mM), potassium dichromate (K<sub>2</sub>Cr<sub>2</sub>O<sub>7</sub>, 50 μM), sodium oxalate (Na<sub>2</sub>C<sub>2</sub>O<sub>4</sub>, 10 mM), sodium azide (NaN<sub>3</sub>, 10 mM), and sodium thiosulfate (Na<sub>2</sub>S<sub>2</sub>O<sub>3</sub>, 0.1 or 10 μM) were applied as the trapping agent of •OH, O<sub>2</sub><sup>-</sup>, e<sup>-</sup>, h<sup>+</sup>, <sup>1</sup>O<sub>2</sub>, and chlorine-active species (Cl• and ClO•).

## Reference:

1. P. Chen, L. Blaney, G. Cagnetta, J. Huang, B. Wang, Y. J. Wang, S. B. Deng and G. Yu, Degradation of Ofloxacin by Perylene Diimide Supramolecular Nanofiber Sunlight-Driven Photocatalysis, *Environ Sci Technol*, 2019, **53**, 1564-1575.
2. Y. Shiraishi, S. Kanazawa, Y. Kofuji, H. Sakamoto, S. Ichikawa, S. Tanaka and T. Hirai, Sunlight-Driven Hydrogen Peroxide Production from Water and Molecular Oxygen by Metal-Free Photocatalysts, *Angew Chem Int Edit*, 2014, **53**, 13454-13459.
3. U. Von Gunten, Ozonation of drinking water: Part I. Oxidation kinetics and product formation, *Water Res*, 2003, **37**, 1443-1467.
4. J. Y. Fang, Y. Fu and C. Shang, The Roles of Reactive Species in Micropollutant Degradation in the UV/Free Chlorine System, *Environ Sci Technol*, 2014, **48**, 1859-1868.
5. J. E. Grebel, J. J. Pignatello and W. A. Mitch, Effect of Halide Ions and Carbonates on Organic Contaminant Degradation by Hydroxyl Radical-Based Advanced Oxidation Processes in Saline Waters, *Environ Sci Technol*, 2010, **44**, 6822-6828.
6. F. Guzman-Duque, C. Petrier, C. Pulgarin, G. Penuela and R. A. Torres-Palma, Effects of sonochemical parameters and inorganic ions during the sonochemical degradation of crystal violet in water, *Ultrason Sonochem*, 2011, **18**, 440-446.
7. L. G. Devi, C. Munikrishnappa, B. Nagaraj and K. E. Rajashekhar, Effect of chloride and sulfate ions on the advanced photo Fenton and modified photo Fenton degradation process of Alizarin Red S, *J Mol Catal a-Chem*, 2013, **374**, 125-131.
8. Z. Wu, J. Fang, Y. Xiang, C. Shang, X. Li, F. Meng and X. Yang, Roles of reactive chlorine species in trimethoprim degradation in the UV/chlorine process: Kinetics and transformation pathways, *Water Res*, 2016, DOI: 10.1016/j.watres.2016.08.011.
